# Supplementary material for: Experimental Prototype of Electromagnetic Emissions for Biotechnological Research: Monitoring Cocoa Bean Fermentation Parameters
Source: MDPI journal article supplement (doi:10.3390/foods12132539), 2023-06-29
Supplement: s1 [file s1]

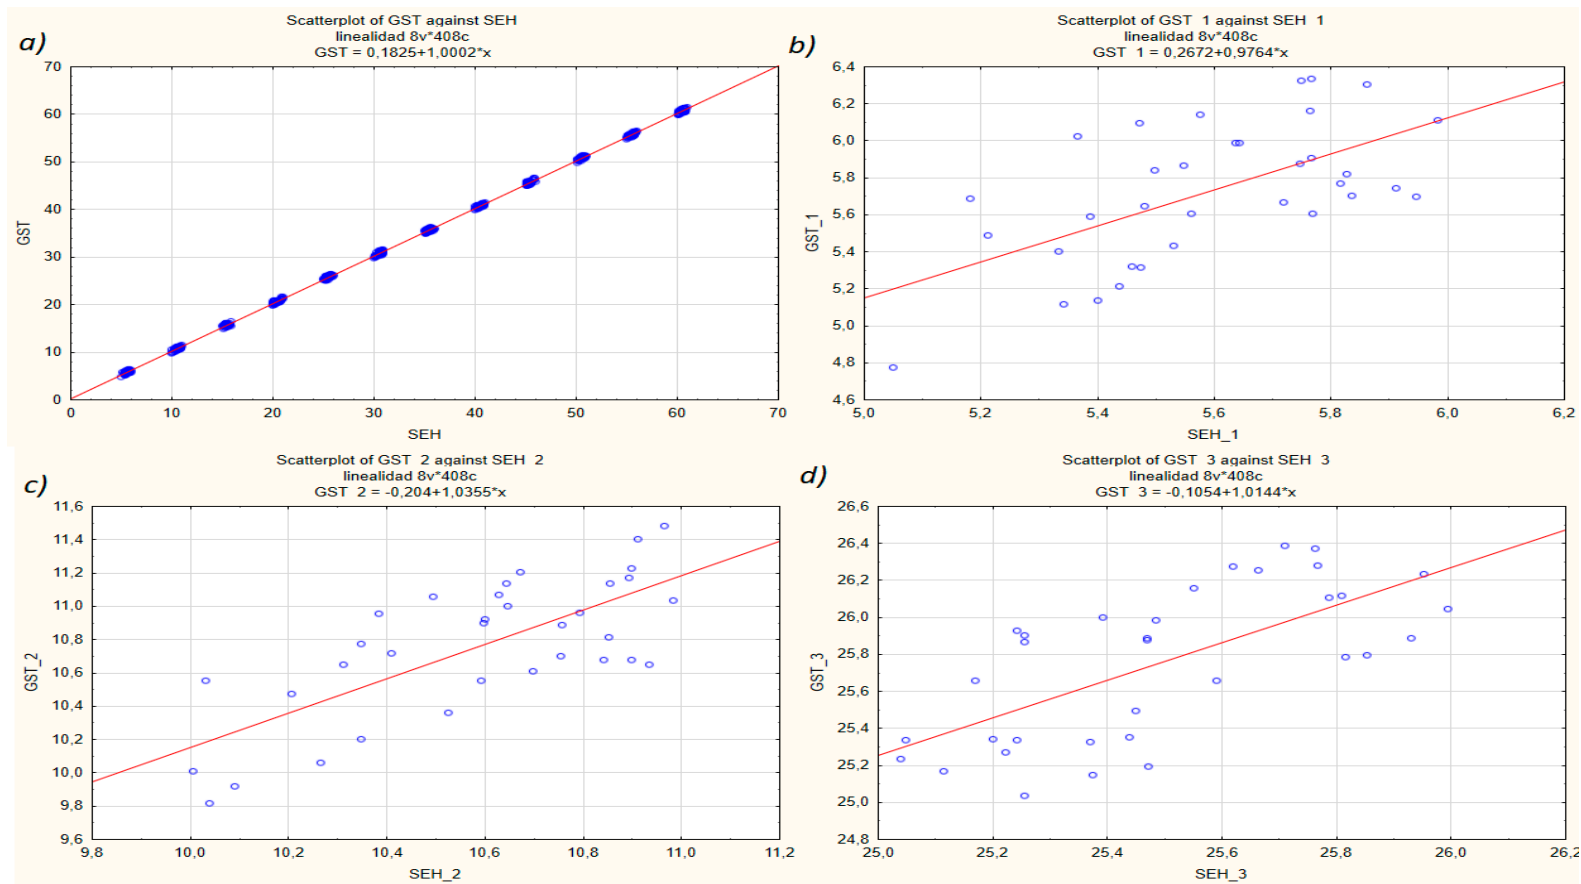

Figure S1 Linearity graph. Vertical axis GST horizontal axis SEH in different OMF density (a), cloud of points (4-7mT) (b), cloud of points (9-12mT) (c), cloud of points (25-27mT) (d).

Table S1. Experimental Design. Factors, levels, and Responses R1 OMF density (6A) levels: analyst1...analyst7; R2 OMF: density (30A) levels: day 1...day 7; R3: OMF density (90A) levels 20, 25, 30, 35, 40, 45, 50

| Factor, levels<br>responses | Unit<br>s | Type        | SubType    | Minimum | Maximum | Coded<br>Low                   | Coded<br>High             | Mean  | Std. Dev. |
|-----------------------------|-----------|-------------|------------|---------|---------|--------------------------------|---------------------------|-------|-----------|
| Radial points $\rho$        | m         | Numeric     | Continuous | -0.5045 | 0.5045  | -1 $\leftrightarrow$ -<br>0.30 | +1 $\leftrightarrow$ 0.30 | 0.000 | 0.2776    |
| Radial points $\alpha$      | m         | Numeric     | Continuous | -0.5045 | 0.5045  | -1 $\leftrightarrow$ -<br>0.30 | +1 $\leftrightarrow$ 0.30 | 0.000 | 0.2776    |
| Axial points Z              | m         | Numeric     | Continuous | -0.1534 | 0.6034  | -1 $\leftrightarrow$ 0.00      | +1 $\leftrightarrow$ 0.45 | 0.225 | 0.2082    |
| Levels                      | -         | Categorical | Nominal    | Level 1 | Level 7 | -                              | -                         | -     | 7.00      |
| OMF density (6A)            | mT        | Numeric     | Continuous | 0.00078 | 5.97101 | -                              | -                         | 2.13  | 2.04      |
| OMF density (30A)           | mT        | Numeric     | Continuous | 0.00531 | 29.9567 | -                              | -                         | 10.76 | 10.27     |
| OMF density (90A)           | mT        | Numeric     | Continuous | 0.00342 | 89.6288 | -                              | -                         | 31.93 | 30.15     |

Table S2 The ANOVA of the OMF Density at different intensities (R1, R2, and R3). There are statistically significant differences in the radial coordinates of the prototype, with a confidence of 95.0%. In all responses, the model F value of the model was significant, and the lack of fit was not significant relative to the

| <i>Source</i>    | <i>Model R1</i>                                                                                         |           |                    |                |                | <i>Model R2</i>                                                                                             |           |                    |                |                | <i>Model R1</i>                                                                                            |           |                    |                |                |
|------------------|---------------------------------------------------------------------------------------------------------|-----------|--------------------|----------------|----------------|-------------------------------------------------------------------------------------------------------------|-----------|--------------------|----------------|----------------|------------------------------------------------------------------------------------------------------------|-----------|--------------------|----------------|----------------|
|                  | <i>Sum of Squares</i>                                                                                   | <i>df</i> | <i>Mean Square</i> | <i>F-value</i> | <i>p-value</i> | <i>Sum of Squares</i>                                                                                       | <i>df</i> | <i>Mean Square</i> | <i>F-value</i> | <i>p-value</i> | <i>Sum of Squares</i>                                                                                      | <i>df</i> | <i>Mean Square</i> | <i>F-value</i> | <i>p-value</i> |
| <b>Models</b>    | 1372.72                                                                                                 | 33        | 41.60              | 537.71         | < 0.0001       | 33856.14                                                                                                    | 69        | 490.67             | 87.63          | < 0.0001       | 2.901E+05                                                                                                  | 33        | 8791.88            | 185.58         | < 0.0001       |
| a z              | 0.5379                                                                                                  | 1         | 0.5379             | 6.95           | 0.0088         | -                                                                                                           | -         | -                  | -              | -              | -                                                                                                          | -         | -                  | -              | -              |
| p                | -                                                                                                       | -         | -                  | -              | -              | -                                                                                                           | -         | -                  | -              | -              | 164.67                                                                                                     | 1         | 164.67             | 3.54           | 164.67         |
| z                | -                                                                                                       | -         | -                  | -              | -              | -                                                                                                           | -         | -                  | -              | -              | 361.02                                                                                                     | 1         | 361.02             | 7.75           | 0.0057         |
| A <sup>2</sup>   | 748.32                                                                                                  | 1         | 748.32             | 9673.23        | < 0.0001       | 18180.51                                                                                                    | 1         | 18180.51           | 3246.92        | < 0.0001       | 1.568E+05                                                                                                  | 1         | 1.568E+05          | 3310.49        | < 0.0001       |
| B <sup>2</sup>   | 748.30                                                                                                  | 1         | 748.30             | 9672.92        | < 0.0001       | 18826.21                                                                                                    | 1         | 18826.21           | 3362.24        | < 0.0001       | 1.624E+05                                                                                                  | 1         | 1.624E+05          | 3428.70        | < 0.0001       |
| C <sup>2</sup>   | 0.6263                                                                                                  | 1         | 0.6263             | 8.10           | 0.0047         | 36.53                                                                                                       | 1         | 36.53              | 6.52           | 0.0112         | 315.88                                                                                                     | 1         | 315.88             | 6.67           | 0.0103         |
| <b>Residual</b>  | 23.36                                                                                                   | 302       | 0.0774             |                |                | 1489.42                                                                                                     | 266       | 5.60               |                |                | 14307.06                                                                                                   | 302       | 47.37              |                |                |
| Lack of Fit      | 4.04                                                                                                    | 71        | 0.0568             | 0.6795         | 0.9717         | 240.19                                                                                                      | 35        | 6.86               | 1.27           | 0.1547         | 3512.97                                                                                                    | 71        | 49.48              | 1.06           | 0.3696         |
| Pure Error       | 19.33                                                                                                   | 231       | 0.0837             |                |                | 1249.22                                                                                                     | 231       | 5.41               |                |                | 10794.09                                                                                                   | 231       | 46.73              |                |                |
| <b>Cor Total</b> | 1396.08                                                                                                 | 335       |                    |                |                | 35345.56                                                                                                    | 335       |                    |                |                | 3.044E+05                                                                                                  | 335       |                    |                |                |
| <b>Equations</b> | R1=79.5189 + -2.5258 * A + 0.820197 * B + 16.313 * C + -315.474 * A^2 + -321.057 * B^2 + -25.1701 * C^2 |           |                    |                |                | R2=27.2235 + -0.0341274 * A + 0.419543 * B + 4.67432 * C + -107.411 * A^2 + -109.302 * B^2 + -8.55944 * C^2 |           |                    |                |                | R3=81.9151 + -0.757741 * A + 0.246059 * B + 1.12196 * C + -28.3927 * A^2 + -28.8951 * B^2 + -1.27424 * C^2 |           |                    |                |                |

pure error. The equations in terms of the coded factors describe the decrease in density as a function of distance

**Table S3. Confirmation.** OMF Density (R1, R2, and R3) in three different working area coordinates.

Confidence = 95%

| <b>Coord.<br/>Analysis<br/>(<math>\rho</math>, <math>\alpha</math>, <math>z</math>)</b> | <b>Responses</b> | <b>Predicted<br/>Mean</b> | <b>Observed Mean</b> | <b>Std Dev</b> | <b>n</b> | <b>SE Pred</b> | <b>95% PI<br/>low</b> | <b>95% PI high</b> |
|-----------------------------------------------------------------------------------------|------------------|---------------------------|----------------------|----------------|----------|----------------|-----------------------|--------------------|
| (0.0, 0.0, 0.27)                                                                        | R1               | 5.60227                   | 5.45714              | 0.278137       | 7        | 0.119541       | 5.36703               | 5.83751            |
| (-0.10,0.18,0.22)                                                                       | R1               | 4.60613                   | 4.77286              | 0.278137       | 7        | 0.12121        | 4.77286               | 4.84466            |
| (-0.17,-0.14,0.40)                                                                      | R1               | 4.45485                   | 4.45485              | 0.278137       | 7        | 0.124951       | 4.20897               | 4.70074            |
| (0.0, 0.0, 0.27)                                                                        | R2               | 27.8616                   | 27.1271              | 2.38681        | 7        | 1.02351        | 25.8479               | 29.8753            |
| (-0.17,-0.14,0.40)                                                                      | R2               | 22.1885                   | 22.1885              | 2.36629        | 7        | 1.19226        | 19.8411               | 24.536             |
| (-0.10,0.18,0.22)                                                                       | R2               | 23.5323                   | 25.9514              | 2.36629        | 7        | 1.23567        | 25.9514               | 25.9652            |
| (0.0, 0.0, 0.27)                                                                        | R3               | 82.0886                   | 79.8743              | 6.82311        | 7        | 2.78019        | 76.6194               | 87.5577            |
| (-0.10,0.18,0.22)                                                                       | R3               | 69.2391                   | 75.0271              | 6.88291        | 7        | 2.99953        | 75.0271               | 75.1417            |
| (-0.17,-0.14,0.40)                                                                      | R3               | 66.5803                   | 66.5803              | 6.88291        | 7        | 3.0921         | 60.4955               | 72.6651            |

Table S4. ANOVA models for Temperature, pH, Humidity, and Brix responses. The models are significant as indicated by their respective F-values of 94.26, 41.34, 38.69, and 74.56. The probability of obtaining such large F-values due to noise is very low (0.01%). The p-values less than 0.0500 for model terms A, B, and AB indicate that they are significant in all four models. Values greater than 0.1000 suggest that model terms are not significant, and their removal may improve the model if there are many insignificant terms.

| Source                   | Sum of Squares | df | Mean Square | F-value | p-value  |             |
|--------------------------|----------------|----|-------------|---------|----------|-------------|
| <b>Temperature model</b> | 6666.90        | 31 | 215.06      | 94.26   | < 0.0001 | significant |
| A-OMF density            | 817.54         | 3  | 272.51      | 119.45  | < 0.0001 |             |
| B-Time                   | 5542.19        | 7  | 791.74      | 347.03  | < 0.0001 |             |
| AB                       | 307.16         | 21 | 14.63       | 6.41    | < 0.0001 |             |
| <b>Pure Error</b>        | 146.01         | 64 | 2.28        |         |          |             |
| <b>Cor Total</b>         | 6812.91        | 95 |             |         |          |             |
| <b>pH model</b>          | 18.09          | 31 | 0.5836      | 41.34   | < 0.0001 | significant |
| A-OMF density            | 1.91           | 3  | 0.6359      | 45.04   | < 0.0001 |             |
| B-Time                   | 14.92          | 7  | 2.13        | 151.00  | < 0.0001 |             |
| AB                       | 1.26           | 21 | 0.0600      | 4.25    | < 0.0001 |             |
| <b>Pure Error</b>        | 0.9036         | 64 | 0.0141      |         |          |             |
| <b>Cor Total</b>         | 19.00          | 95 |             |         |          |             |
| <b>Humidity model</b>    | 1207.09        | 31 | 38.94       | 38.69   | < 0.0001 | significant |
| A-OMF density            | 131.32         | 3  | 43.77       | 43.50   | < 0.0001 |             |
| B-Time                   | 1010.94        | 7  | 144.42      | 143.50  | < 0.0001 |             |
| AB                       | 64.82          | 21 | 3.09        | 3.07    | 0.0003   |             |
| <b>Pure Error</b>        | 64.41          | 64 | 1.01        |         |          |             |
| <b>Cor Total</b>         | 1271.50        | 95 |             |         |          |             |
| <b>Brix model</b>        | 1315.86        | 31 | 42.45       | 74.56   | < 0.0001 | significant |
| A-OMF density            | 44.80          | 3  | 14.93       | 26.23   | < 0.0001 |             |
| B-Time                   | 1200.66        | 7  | 171.52      | 301.30  | < 0.0001 |             |
| AB                       | 70.40          | 21 | 3.35        | 5.89    | < 0.0001 |             |
| <b>Pure Error</b>        | 36.43          | 64 | 0.5693      |         |          |             |
| <b>Cor Total</b>         | 1352.29        | 95 |             |         |          |             |

Table S5. The ANOVA for Wi, Fi, and Di responses. The models for Wi, Fi, and Di are significant. The F-values for Wi, Fi, and Di are 77.37, 31.60, and 9.59, respectively, indicating that the models are highly significant with only a 0.01% chance that the observed F-values are due to noise. The p-values for the model terms A, B, and AB are less than 0.0500 for Wi and Fi, and B is significant for Di, indicating that these terms have a significant effect on the response variable. Poisson Regression (Type III) for Fd. The significant model terms A, B, and AB, with p-values less than 0.0500. Values greater than 0.1000 indicate that the model terms are not significant. The analysis used  $\chi^2$  Log Likelihood Ratio p-values. Analysis was performed with a log link and inverse link of exp, using Maximum Likelihood (ML) analysis

| Source              | Sum of Squares             | df        | Mean Square    | F-value | p-value              |
|---------------------|----------------------------|-----------|----------------|---------|----------------------|
| <b>Wi model</b>     | 2911.40                    | 31        | 93.92          | 77.37   | < 0.0001 significant |
| A-OMF density       | 125.63                     | 3         | 41.88          | 34.50   | < 0.0001             |
| B-Time              | 2607.83                    | 7         | 372.55         | 306.92  | < 0.0001             |
| AB                  | 177.95                     | 21        | 8.47           | 6.98    | < 0.0001             |
| <b>Pure Error</b>   | 77.68                      | 64        | 1.21           |         |                      |
| <b>Cor Total</b>    | 2989.09                    | 95        |                |         |                      |
| <b>Fi model</b>     | 42.77                      | 31        | 1.38           | 31.60   | < 0.0001 significant |
| A-OMF density       | 1.78                       | 3         | 0.5937         | 13.60   | < 0.0001             |
| B-Time              | 39.89                      | 7         | 5.70           | 130.52  | < 0.0001             |
| AB                  | 1.09                       | 21        | 0.0521         | 1.19    | 0.2870               |
| <b>Pure Error</b>   | 2.79                       | 64        | 0.0437         |         |                      |
| <b>Cor Total</b>    | 45.56                      | 95        |                |         |                      |
| <b>Di model</b>     | 166.54                     | 31        | 5.37           | 9.59    | < 0.0001 significant |
| A-OMF density       | 1.74                       | 3         | 0.5803         | 1.04    | 0.3827               |
| B-Time              | 154.73                     | 7         | 22.10          | 39.47   | < 0.0001             |
| AB                  | 10.06                      | 21        | 0.4792         | 0.8557  | 0.6440               |
| <b>Pure Error</b>   | 35.84                      | 64        | 0.5600         |         |                      |
| <b>Cor Total</b>    | 202.38                     | 95        |                |         |                      |
| <b>Source</b>       | <b><math>\chi^2</math></b> | <b>df</b> | <b>p-value</b> |         |                      |
| <b>Fd model</b>     | 3306.74                    | 3         | < 0.0001       |         |                      |
| A-Densidad CMO (mT) | 58.69                      | 3         | < 0.0001       |         |                      |
| B-B                 | 3020.86                    | 2         | < 0.0001       |         |                      |
| AB                  | 401.81                     | 6         | < 0.0001       |         |                      |

Table S6. ANOVA models for LAB, AAB, and Y responses. The models are significant, as indicated by their respective F-values of 6.49, 33.26, and 8.91. The probability of obtaining such large F-values due to noise is very low (0.01%). The p-values less than 0.0500 for model terms A, B, and AB indicate that they are significant in all three models. ANOVA Y model terms B and AB are significant. Values greater than 0.1000 suggest that, the three models provide significant results

| Source            | Sum of Squares | df | Mean Square | F-value | p-value              |
|-------------------|----------------|----|-------------|---------|----------------------|
| <b>LAB model</b>  | 90.89          | 31 | 2.93        | 6.49    | < 0.0001 significant |
| A-OMF density     | 32.91          | 3  | 10.97       | 24.27   | < 0.0001             |
| B-Time            | 18.02          | 7  | 2.57        | 5.70    | < 0.0001             |
| AB                | 39.96          | 21 | 1.90        | 4.21    | < 0.0001             |
| <b>Pure Error</b> | 28.92          | 64 | 0.4519      |         |                      |
| <b>Cor Total</b>  | 119.81         | 95 |             |         |                      |
| <b>AAB model</b>  | 320.89         | 31 | 10.35       | 33.26   | < 0.0001 significant |
| A-OMF density     | 96.80          | 3  | 32.27       | 103.67  | < 0.0001             |
| B-Time            | 176.00         | 7  | 25.14       | 80.78   | < 0.0001             |
| AB                | 48.09          | 21 | 2.29        | 7.36    | < 0.0001             |
| <b>Pure Error</b> | 19.92          | 64 | 0.3112      |         |                      |
| <b>Cor Total</b>  | 340.81         | 95 |             |         |                      |
| <b>Y model</b>    | 141.92         | 31 | 4.58        | 8.91    | < 0.0001 significant |
| A-OMF density     | 1.00           | 3  | 0.3346      | 0.6515  | 0.5849               |
| B-Time            | 119.81         | 7  | 17.12       | 33.32   | < 0.0001             |
| AB                | 21.11          | 21 | 1.01        | 1.96    | 0.0211               |
| <b>Pure Error</b> | 32.87          | 64 | 0.5136      |         |                      |
| <b>Cor Total</b>  | 174.79         | 95 |             |         |                      |
